# Supplementary material
Source: PubMed Central journal article supplement (PMC7304866)
Supplement: ct9b00703_si_003.pdf [file ct9b00703_si_003.pdf]

# Supporting Information for *Nuclear Quantum Effects from the Analysis of Smoothed Trajectories: Pilot Study for Water*

Dénes Berta<sup>1,2</sup>, Dávid Ferenc<sup>1</sup>, Imre Bakó<sup>1</sup>, and Ádám Madarász\*<sup>1</sup>

<sup>1</sup>Research Center for Natural Sciences, Hungarian Academy of Sciences, Magyar Tudósok Körútja 2, H-1117 Budapest, Hungary

<sup>2</sup>Department of Chemistry, Kings College London, 7 Trinity Street, SE1 1DB London, United Kingdom

## 1 Calculated data

### 1.1 BOMD

Table 1: Isobaric heat capacities for one water molecule obtained from BOMD simulations. The data is depicted as Figure 5. in the main text.

| $T / \text{K}$ | $c_p / \text{J}\cdot\text{K}^{-1}\text{mol}^{-1}$ |              |              |                |                |                |
|----------------|---------------------------------------------------|--------------|--------------|----------------|----------------|----------------|
|                | experimental                                      | class.<br>HO | quant.<br>HO | class.<br>sim. | 1PT            | GSTA           |
| 25             | -                                                 | 58.201       | 33.257       | 58.202         | 33.2951±0.0005 | 33.2690±0.0004 |
| 100            | 33.30086±0.00001                                  | 58.201       | 33.257       | 58.242         | 33.2674±0.0054 | 33.3012±0.0018 |
| 200            | 33.35053±0.00001                                  | 58.201       | 33.269       | 58.314         | 33.289±0.011   | 33.3815±0.0053 |
| 300            | 33.59584±0.00001                                  | 58.201       | 33.490       | 58.373         | 33.504±0.021   | 33.696±0.011   |
| 400            | 34.26208±0.00001                                  | 58.201       | 34.153       | 58.410         | 34.148±0.054   | 34.435±0.023   |
| 500            | 35.22593±0.00001                                  | 58.201       | 35.122       | 58.413         | 35.09±0.11     | 35.438±0.037   |
| 600            | 36.32471±0.00001                                  | 58.201       | 36.219       | 58.474         | 36.16±0.18     | 36.647±0.047   |
| 700            | 37.49627±0.00001                                  | 58.201       | 37.376       | 58.496         | 37.27±0.27     | 37.680±0.090   |
| 800            | 38.72398±0.00001                                  | 58.201       | 38.575       | 58.660         | 38.40±0.32     | 39.26±0.12     |
| 900            | 39.99172±0.00001                                  | 58.201       | 39.800       | 58.660         | 39.56±0.35     | 40.46±0.12     |
| 1000           | 41.27527±0.00001                                  | 58.201       | 41.029       | 58.660         | 40.72±0.36     | 41.66±0.13     |
| 1250           | 44.37821±0.00005                                  | 58.201       | 43.959       | 58.895         | 43.83±0.58     | 45.13±0.16     |
| 1500           | 47.14441±0.00007                                  | 58.201       | 46.494       | 58.895         | 46.30±0.54     | 47.54±0.14     |
| 1750           | 49.4397±0.0003                                    | 58.201       | 48.563       | 58.997         | 48.30±0.49     | 49.32±0.17     |
| 2000           | 51.3787±0.0003                                    | 58.201       | 50.210       | 58.997         | 49.96±0.42     | 50.93±0.15     |
| 2500           | 54.255±0.0001                                     | 58.201       | 52.549       | 59.311         | 52.38±0.30     | 53.617±0.096   |
| 3000           | 56.337±0.0001                                     | 58.201       | 54.043       | 59.311         | 53.90±0.22     | 55.53±0.15     |
| 4000           | 58.98±0.07                                        | 58.201       | 55.719       | 60.802         | 55.73±0.24     | 58.41±0.18     |
| 5000           | 59.5±0.6                                          | 58.201       | 56.566       | 61.350         | 56.61±0.20     | 59.83±0.20     |

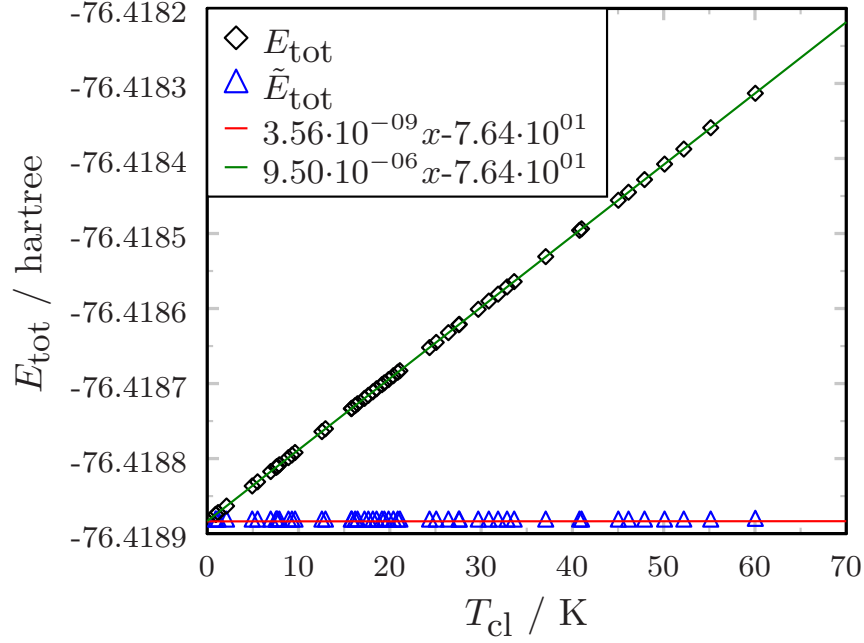

Figure 1: Classic and smoothed total energies (at 25 K) as a function of simulation temperature.

Table 2: Simulation temperature, total average energy and smoothed average energy components of trajectories associated to the calculation at 25 K.

| trajectory # | $T_{\text{simul.}} / \text{K}$ | $\langle E_{\text{tot}} \rangle / E_{\text{h}}$ | $\langle \tilde{E}_{\text{kin}} \rangle / E_{\text{h}}$ | $\langle \tilde{E}_{\text{pot}} \rangle / E_{\text{h}}$ | $\langle \tilde{E}_{\text{tot}} \rangle / E_{\text{h}}$ |
|--------------|--------------------------------|-------------------------------------------------|---------------------------------------------------------|---------------------------------------------------------|---------------------------------------------------------|
| 1            | 19.866912                      | -76.418695                                      | 0.000000                                                | -76.418883                                              | -76.418884                                              |
| 2            | 18.551783                      | -76.418707                                      | 0.000000                                                | -76.418883                                              | -76.418884                                              |
| 3            | 37.082071                      | -76.418531                                      | 0.000000                                                | -76.418883                                              | -76.418884                                              |
| 4            | 6.952979                       | -76.418817                                      | 0.000000                                                | -76.418883                                              | -76.418884                                              |
| 5            | 46.151819                      | -76.418445                                      | 0.000000                                                | -76.418883                                              | -76.418884                                              |
| 6            | 20.393037                      | -76.418690                                      | 0.000000                                                | -76.418883                                              | -76.418884                                              |
| 7            | 20.871646                      | -76.418685                                      | 0.000000                                                | -76.418883                                              | -76.418884                                              |
| 8            | 24.353105                      | -76.418652                                      | 0.000000                                                | -76.418883                                              | -76.418884                                              |
| 9            | 7.900259                       | -76.418808                                      | 0.000000                                                | -76.418883                                              | -76.418884                                              |
| 10           | 47.907274                      | -76.418428                                      | 0.000000                                                | -76.418883                                              | -76.418884                                              |
| 11           | 17.230258                      | -76.418720                                      | 0.000000                                                | -76.418883                                              | -76.418884                                              |
| 12           | 25.086490                      | -76.418645                                      | 0.000000                                                | -76.418883                                              | -76.418884                                              |
| 13           | 45.035018                      | -76.418456                                      | 0.000000                                                | -76.418883                                              | -76.418884                                              |
| 14           | 7.539762                       | -76.418812                                      | 0.000000                                                | -76.418883                                              | -76.418884                                              |
| 15           | 12.951782                      | -76.418760                                      | 0.000000                                                | -76.418883                                              | -76.418884                                              |
| 16           | 41.008626                      | -76.418494                                      | 0.000000                                                | -76.418883                                              | -76.418884                                              |
| 17           | 21.107462                      | -76.418683                                      | 0.000000                                                | -76.418883                                              | -76.418884                                              |
| 18           | 32.849149                      | -76.418571                                      | 0.000000                                                | -76.418883                                              | -76.418884                                              |
| 19           | 16.464054                      | -76.418727                                      | 0.000000                                                | -76.418883                                              | -76.418884                                              |
| 20           | 33.628363                      | -76.418564                                      | 0.000000                                                | -76.418883                                              | -76.418884                                              |
| 21           | 29.691422                      | -76.418601                                      | 0.000000                                                | -76.418883                                              | -76.418884                                              |
| 22           | 7.615798                       | -76.418811                                      | 0.000000                                                | -76.418883                                              | -76.418884                                              |
| 23           | 30.846664                      | -76.418590                                      | 0.000000                                                | -76.418883                                              | -76.418884                                              |
| 24           | 19.399638                      | -76.418699                                      | 0.000000                                                | -76.418883                                              | -76.418884                                              |
| 25           | 27.616980                      | -76.418621                                      | 0.000000                                                | -76.418883                                              | -76.418884                                              |

|    |           |            |          |            |            |
|----|-----------|------------|----------|------------|------------|
| 26 | 16.204073 | -76.418729 | 0.000000 | -76.418883 | -76.418884 |
| 27 | 60.044792 | -76.418313 | 0.000000 | -76.418883 | -76.418883 |
| 28 | 0.930725  | -76.418875 | 0.000000 | -76.418883 | -76.418884 |
| 29 | 40.787429 | -76.418496 | 0.000000 | -76.418883 | -76.418884 |
| 30 | 12.561501 | -76.418764 | 0.000000 | -76.418883 | -76.418884 |
| 31 | 27.561041 | -76.418622 | 0.000000 | -76.418883 | -76.418884 |
| 32 | 55.157337 | -76.418359 | 0.000000 | -76.418883 | -76.418884 |
| 33 | 9.277765  | -76.418795 | 0.000000 | -76.418883 | -76.418884 |
| 34 | 4.928422  | -76.418837 | 0.000000 | -76.418883 | -76.418884 |
| 35 | 52.208174 | -76.418387 | 0.000000 | -76.418883 | -76.418884 |
| 36 | 50.102161 | -76.418407 | 0.000000 | -76.418883 | -76.418884 |
| 37 | 7.690415  | -76.418810 | 0.000000 | -76.418883 | -76.418884 |
| 38 | 15.842267 | -76.418733 | 0.000000 | -76.418883 | -76.418884 |
| 39 | 8.897298  | -76.418799 | 0.000000 | -76.418883 | -76.418884 |
| 40 | 9.620797  | -76.418792 | 0.000000 | -76.418883 | -76.418884 |
| 41 | 18.146198 | -76.418711 | 0.000000 | -76.418883 | -76.418884 |
| 42 | 1.189822  | -76.418872 | 0.000000 | -76.418883 | -76.418884 |
| 43 | 17.653120 | -76.418716 | 0.000000 | -76.418883 | -76.418884 |
| 44 | 15.779474 | -76.418734 | 0.000000 | -76.418883 | -76.418884 |
| 45 | 0.952940  | -76.418874 | 0.000000 | -76.418883 | -76.418884 |
| 46 | 31.862410 | -76.418581 | 0.000000 | -76.418883 | -76.418884 |
| 47 | 2.115710  | -76.418863 | 0.000000 | -76.418883 | -76.418884 |
| 48 | 5.514108  | -76.418831 | 0.000000 | -76.418883 | -76.418884 |
| 49 | 26.421039 | -76.418632 | 0.000000 | -76.418883 | -76.418884 |
| 50 | 19.142372 | -76.418701 | 0.000000 | -76.418883 | -76.418884 |

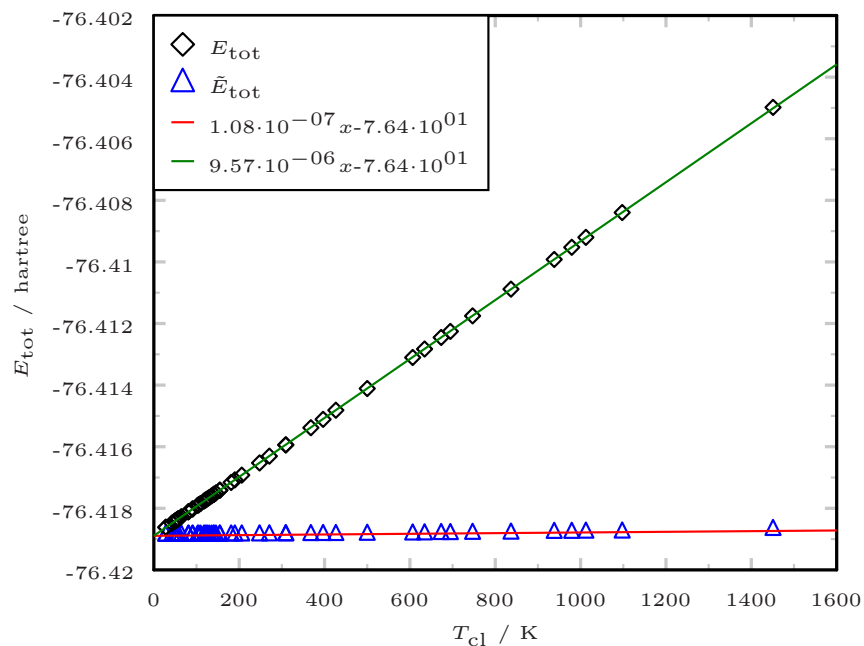

Figure 2: Classic and smoothed total energies (at 300 K) as a function of simulation temperature.

Table 3: Simulation temperature, total average energy and smoothed average energy components of trajectories associated to the calculation at 300 K.

| trajectory # | $T_{\text{simul.}} / \text{K}$ | $\langle E_{\text{tot}} \rangle / E_{\text{h}}$ | $\langle \tilde{E}_{\text{kin}} \rangle / E_{\text{h}}$ | $\langle \tilde{E}_{\text{pot}} \rangle / E_{\text{h}}$ | $\langle \tilde{E}_{\text{tot}} \rangle / E_{\text{h}}$ |
|--------------|--------------------------------|-------------------------------------------------|---------------------------------------------------------|---------------------------------------------------------|---------------------------------------------------------|
| 1            | 47.771430                      | -76.418420                                      | 0.000001                                                | -76.418882                                              | -76.418882                                              |
| 2            | 51.736343                      | -76.418392                                      | 0.000001                                                | -76.418882                                              | -76.418881                                              |
| 3            | 57.199859                      | -76.418330                                      | 0.000001                                                | -76.418882                                              | -76.418881                                              |
| 4            | 64.431401                      | -76.418271                                      | 0.000001                                                | -76.418882                                              | -76.418880                                              |
| 5            | 80.493234                      | -76.418118                                      | 0.000001                                                | -76.418882                                              | -76.418880                                              |
| 6            | 91.234938                      | -76.418016                                      | 0.000001                                                | -76.418881                                              | -76.418880                                              |
| 7            | 102.817529                     | -76.417906                                      | 0.000003                                                | -76.418881                                              | -76.418879                                              |
| 8            | 105.107134                     | -76.417884                                      | 0.000003                                                | -76.418881                                              | -76.418879                                              |
| 9            | 120.166742                     | -76.417741                                      | 0.000002                                                | -76.418880                                              | -76.418879                                              |
| 10           | 122.772521                     | -76.417716                                      | 0.000003                                                | -76.418881                                              | -76.418877                                              |
| 11           | 126.177977                     | -76.417684                                      | 0.000003                                                | -76.418880                                              | -76.418878                                              |
| 12           | 140.687295                     | -76.417546                                      | 0.000003                                                | -76.418880                                              | -76.418878                                              |
| 13           | 145.455027                     | -76.417499                                      | 0.000003                                                | -76.418879                                              | -76.418877                                              |
| 14           | 154.985656                     | -76.417409                                      | 0.000003                                                | -76.418879                                              | -76.418877                                              |
| 15           | 189.806466                     | -76.417077                                      | 0.000003                                                | -76.418878                                              | -76.418875                                              |
| 16           | 309.464605                     | -76.415939                                      | 0.000007                                                | -76.418874                                              | -76.418867                                              |
| 17           | 27.935496                      | -76.418618                                      | 0.000001                                                | -76.418883                                              | -76.418882                                              |
| 18           | 28.249487                      | -76.418615                                      | 0.000000                                                | -76.418883                                              | -76.418882                                              |
| 19           | 42.342384                      | -76.418481                                      | 0.000001                                                | -76.418883                                              | -76.418882                                              |
| 20           | 49.724228                      | -76.418411                                      | 0.000001                                                | -76.418883                                              | -76.418881                                              |
| 21           | 55.024174                      | -76.418361                                      | 0.000001                                                | -76.418882                                              | -76.418882                                              |
| 22           | 57.232434                      | -76.418339                                      | 0.000001                                                | -76.418882                                              | -76.418882                                              |
| 23           | 81.602441                      | -76.418108                                      | 0.000002                                                | -76.418882                                              | -76.418880                                              |
| 24           | 90.299678                      | -76.418024                                      | 0.000002                                                | -76.418882                                              | -76.418879                                              |
| 25           | 109.325354                     | -76.417845                                      | 0.000003                                                | -76.418881                                              | -76.418879                                              |
| 26           | 117.332536                     | -76.417768                                      | 0.000003                                                | -76.418881                                              | -76.418878                                              |
| 27           | 130.175509                     | -76.417645                                      | 0.000002                                                | -76.418880                                              | -76.418879                                              |
| 28           | 135.572848                     | -76.417595                                      | 0.000002                                                | -76.418880                                              | -76.418878                                              |
| 29           | 140.428636                     | -76.417548                                      | 0.000003                                                | -76.418880                                              | -76.418877                                              |
| 30           | 154.305208                     | -76.417416                                      | 0.000003                                                | -76.418879                                              | -76.418877                                              |
| 31           | 181.146542                     | -76.417161                                      | 0.000005                                                | -76.418879                                              | -76.418874                                              |
| 32           | 206.026005                     | -76.416923                                      | 0.000004                                                | -76.418878                                              | -76.418874                                              |
| 33           | 247.740147                     | -76.416527                                      | 0.000006                                                | -76.418876                                              | -76.418871                                              |
| 34           | 270.718106                     | -76.416307                                      | 0.000005                                                | -76.418875                                              | -76.418870                                              |
| 35           | 308.915773                     | -76.415943                                      | 0.000006                                                | -76.418872                                              | -76.418866                                              |
| 36           | 367.968859                     | -76.415384                                      | 0.000009                                                | -76.418870                                              | -76.418860                                              |
| 37           | 396.643958                     | -76.415112                                      | 0.000010                                                | -76.418868                                              | -76.418858                                              |
| 38           | 426.520818                     | -76.414816                                      | 0.000008                                                | -76.418866                                              | -76.418857                                              |
| 39           | 500.065127                     | -76.414112                                      | 0.000011                                                | -76.418860                                              | -76.418850                                              |
| 40           | 606.577917                     | -76.413103                                      | 0.000012                                                | -76.418853                                              | -76.418841                                              |
| 41           | 634.429189                     | -76.412828                                      | 0.000014                                                | -76.418851                                              | -76.418838                                              |
| 42           | 673.297040                     | -76.412453                                      | 0.000016                                                | -76.418843                                              | -76.418826                                              |
| 43           | 694.843623                     | -76.412257                                      | 0.000015                                                | -76.418844                                              | -76.418828                                              |
| 44           | 746.962952                     | -76.411753                                      | 0.000017                                                | -76.418837                                              | -76.418819                                              |
| 45           | 836.906759                     | -76.410884                                      | 0.000017                                                | -76.418830                                              | -76.418814                                              |
| 46           | 938.225161                     | -76.409920                                      | 0.000022                                                | -76.418811                                              | -76.418789                                              |
| 47           | 979.341762                     | -76.409526                                      | 0.000023                                                | -76.418810                                              | -76.418787                                              |
| 48           | 1012.447338                    | -76.409203                                      | 0.000022                                                | -76.418803                                              | -76.418781                                              |
| 49           | 1097.556042                    | -76.408397                                      | 0.000023                                                | -76.418801                                              | -76.418778                                              |

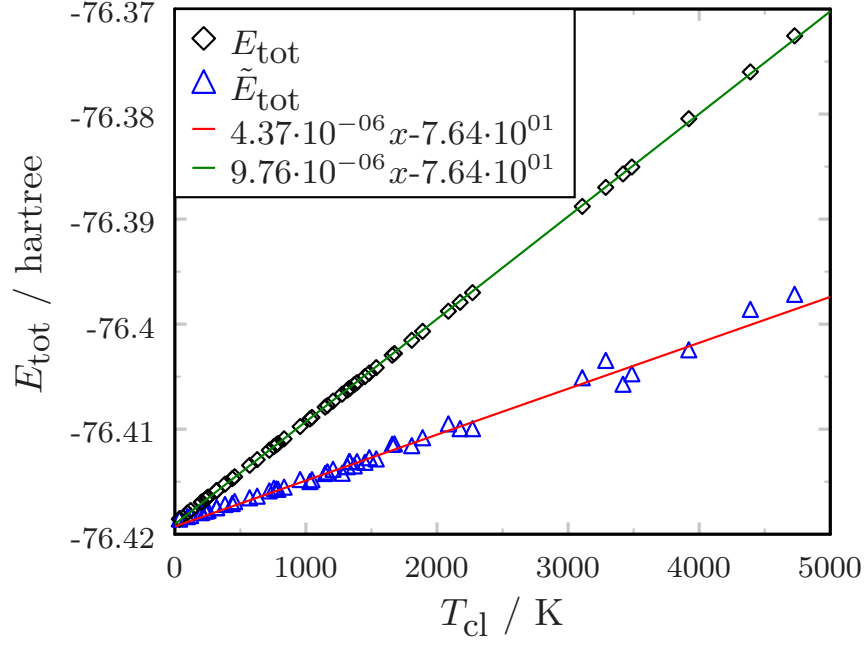

Figure 3: Classic and smoothed total energies (at 1250 K) as a function of simulation temperature.

Table 4: Simulation temperature, total average energy and smoothed average energy components of trajectories associated to the calculation at 1250 K.

| trajectory # | $T_{\text{simul.}} / \text{K}$ | $\langle E_{\text{tot}} \rangle / E_{\text{h}}$ | $\langle \tilde{E}_{\text{kin}} \rangle / E_{\text{h}}$ | $\langle \tilde{E}_{\text{pot}} \rangle / E_{\text{h}}$ | $\langle \tilde{E}_{\text{tot}} \rangle / E_{\text{h}}$ |
|--------------|--------------------------------|-------------------------------------------------|---------------------------------------------------------|---------------------------------------------------------|---------------------------------------------------------|
| 1            | 1333.712780                    | -76.406120                                      | 0.002742                                                | -76.416044                                              | -76.413302                                              |
| 2            | 4390.608111                    | -76.375986                                      | 0.009447                                                | -76.408255                                              | -76.398810                                              |
| 3            | 3920.875781                    | -76.380442                                      | 0.007521                                                | -76.410177                                              | -76.402658                                              |
| 4            | 318.963531                     | -76.415850                                      | 0.000600                                                | -76.418283                                              | -76.417684                                              |
| 5            | 1316.959622                    | -76.406279                                      | 0.002502                                                | -76.416287                                              | -76.413786                                              |
| 6            | 3287.607896                    | -76.386981                                      | 0.007297                                                | -76.410963                                              | -76.403668                                              |
| 7            | 201.064587                     | -76.416972                                      | 0.000363                                                | -76.418519                                              | -76.418156                                              |
| 8            | 833.676272                     | -76.410921                                      | 0.001556                                                | -76.417287                                              | -76.415732                                              |
| 9            | 119.952866                     | -76.417744                                      | 0.000224                                                | -76.418659                                              | -76.418434                                              |
| 10           | 1675.450639                    | -76.402794                                      | 0.003559                                                | -76.415176                                              | -76.411617                                              |
| 11           | 3419.041133                    | -76.385700                                      | 0.006125                                                | -76.412059                                              | -76.405935                                              |
| 12           | 1163.992933                    | -76.407751                                      | 0.002264                                                | -76.416543                                              | -76.414279                                              |
| 13           | 2086.883121                    | -76.398765                                      | 0.004439                                                | -76.414146                                              | -76.409709                                              |
| 14           | 775.597843                     | -76.411476                                      | 0.001466                                                | -76.417374                                              | -76.415909                                              |
| 15           | 570.587407                     | -76.413443                                      | 0.001058                                                | -76.417807                                              | -76.416749                                              |
| 16           | 1449.906882                    | -76.404994                                      | 0.002698                                                | -76.416070                                              | -76.413372                                              |
| 17           | 1368.644295                    | -76.405759                                      | 0.002524                                                | -76.416233                                              | -76.413710                                              |
| 18           | 3486.513693                    | -76.385039                                      | 0.006606                                                | -76.411545                                              | -76.404940                                              |
| 19           | 438.271156                     | -76.414706                                      | 0.000787                                                | -76.418079                                              | -76.417292                                              |
| 20           | 253.740096                     | -76.416469                                      | 0.000470                                                | -76.418408                                              | -76.417939                                              |
| 21           | 2270.896377                    | -76.396998                                      | 0.004219                                                | -76.414382                                              | -76.410165                                              |
| 22           | 1147.048718                    | -76.407899                                      | 0.002182                                                | -76.416615                                              | -76.414434                                              |

|    |             |            |          |            |            |
|----|-------------|------------|----------|------------|------------|
| 23 | 786.716463  | -76.411371 | 0.001461 | -76.417393 | -76.415933 |
| 24 | 1483.558337 | -76.404656 | 0.002914 | -76.415843 | -76.412930 |
| 25 | 1657.986969 | -76.402961 | 0.003534 | -76.415195 | -76.411661 |
| 26 | 1389.552737 | -76.405570 | 0.002741 | -76.416038 | -76.413298 |
| 27 | 720.395718  | -76.412007 | 0.001381 | -76.417469 | -76.416089 |
| 28 | 755.823636  | -76.411661 | 0.001504 | -76.417339 | -76.415836 |
| 29 | 3108.433250 | -76.388792 | 0.006522 | -76.411837 | -76.405317 |
| 30 | 318.042130  | -76.415853 | 0.000594 | -76.418277 | -76.417682 |
| 31 | 1807.519706 | -76.401536 | 0.003447 | -76.415230 | -76.411784 |
| 32 | 1046.303525 | -76.408878 | 0.001895 | -76.416917 | -76.415022 |
| 33 | 1030.810745 | -76.409026 | 0.001806 | -76.417009 | -76.415203 |
| 34 | 956.005693  | -76.409750 | 0.001909 | -76.416919 | -76.415010 |
| 35 | 1206.747793 | -76.407327 | 0.002378 | -76.416412 | -76.414034 |
| 36 | 37.096872   | -76.418531 | 0.000069 | -76.418814 | -76.418746 |
| 37 | 1330.512774 | -76.406116 | 0.002735 | -76.416023 | -76.413288 |
| 38 | 456.468694  | -76.414531 | 0.000880 | -76.417984 | -76.417104 |
| 39 | 4728.359660 | -76.372550 | 0.010030 | -76.407403 | -76.397376 |
| 40 | 232.310763  | -76.416672 | 0.000436 | -76.418442 | -76.418007 |
| 41 | 382.688870  | -76.415236 | 0.000743 | -76.418125 | -76.417383 |
| 42 | 628.172103  | -76.412899 | 0.001140 | -76.417731 | -76.416590 |
| 43 | 205.860126  | -76.416926 | 0.000369 | -76.418513 | -76.418144 |
| 44 | 1890.097622 | -76.400688 | 0.003801 | -76.414829 | -76.411030 |
| 45 | 244.924500  | -76.416553 | 0.000444 | -76.418435 | -76.417992 |
| 46 | 34.152788   | -76.418559 | 0.000063 | -76.418820 | -76.418758 |
| 47 | 95.924918   | -76.417972 | 0.000172 | -76.418710 | -76.418538 |
| 48 | 2176.243159 | -76.397924 | 0.004227 | -76.414390 | -76.410163 |
| 49 | 1276.579412 | -76.406664 | 0.002191 | -76.416600 | -76.414410 |
| 50 | 1536.470085 | -76.404141 | 0.002842 | -76.415890 | -76.413048 |

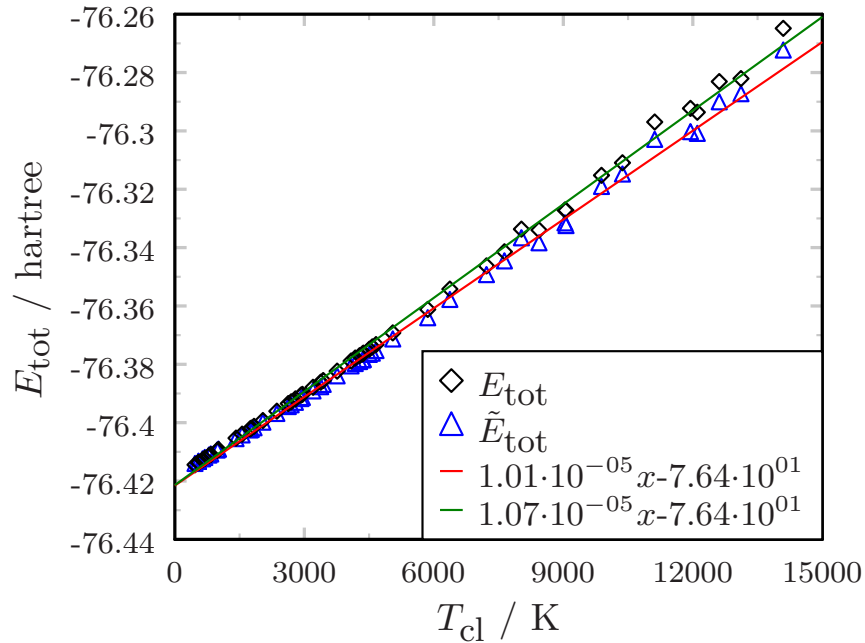

Figure 4: Classic and smoothed total energies (at 5000 K) as a function of simulation temperature.

Table 5: Simulation temperature, total average energy and smoothed average energy components of trajectories associated to the calculation at 5000 K.

| trajectory # | $T_{\text{simul.}} / \text{K}$ | $\langle E_{\text{tot}} \rangle / E_{\text{h}}$ | $\langle \tilde{E}_{\text{kin}} \rangle / E_{\text{h}}$ | $\langle \tilde{E}_{\text{pot}} \rangle / E_{\text{h}}$ | $\langle \tilde{E}_{\text{tot}} \rangle / E_{\text{h}}$ |
|--------------|--------------------------------|-------------------------------------------------|---------------------------------------------------------|---------------------------------------------------------|---------------------------------------------------------|
| 1            | 694.597252                     | -76.412247                                      | 0.003077                                                | -76.415765                                              | -76.412689                                              |
| 2            | 832.494556                     | -76.410929                                      | 0.003666                                                | -76.415165                                              | -76.411500                                              |
| 3            | 4506.500275                    | -76.374828                                      | 0.020136                                                | -76.397496                                              | -76.377361                                              |
| 4            | 7636.440400                    | -76.341424                                      | 0.034297                                                | -76.379610                                              | -76.345316                                              |
| 5            | 9063.468751                    | -76.327251                                      | 0.040026                                                | -76.373233                                              | -76.333212                                              |
| 6            | 2040.201700                    | -76.399266                                      | 0.009020                                                | -76.409619                                              | -76.400600                                              |
| 7            | 4368.340222                    | -76.376170                                      | 0.019263                                                | -76.398386                                              | -76.379124                                              |
| 8            | 644.151392                     | -76.412745                                      | 0.002850                                                | -76.416009                                              | -76.413159                                              |
| 9            | 9038.999319                    | -76.327107                                      | 0.040314                                                | -76.372607                                              | -76.332297                                              |
| 10           | 982.043308                     | -76.409507                                      | 0.004338                                                | -76.414492                                              | -76.410155                                              |
| 11           | 3760.138562                    | -76.382341                                      | 0.016661                                                | -76.401379                                              | -76.384720                                              |
| 12           | 11946.573497                   | -76.292284                                      | 0.052342                                                | -76.353364                                              | -76.301028                                              |
| 13           | 8030.156058                    | -76.333672                                      | 0.036247                                                | -76.373648                                              | -76.337404                                              |
| 14           | 5859.544865                    | -76.361192                                      | 0.026000                                                | -76.390802                                              | -76.364806                                              |
| 15           | 4083.537327                    | -76.378875                                      | 0.018182                                                | -76.399481                                              | -76.381301                                              |
| 16           | 4575.501891                    | -76.374025                                      | 0.020265                                                | -76.397210                                              | -76.376947                                              |
| 17           | 12614.085664                   | -76.283101                                      | 0.056049                                                | -76.346836                                              | -76.290793                                              |
| 18           | 8437.617711                    | -76.333970                                      | 0.037476                                                | -76.376591                                              | -76.339119                                              |
| 19           | 13117.096906                   | -76.282069                                      | 0.059287                                                | -76.347298                                              | -76.288017                                              |
| 20           | 12105.297308                   | -76.293607                                      | 0.053473                                                | -76.355082                                              | -76.301615                                              |
| 21           | 2922.968254                    | -76.390565                                      | 0.012912                                                | -76.405411                                              | -76.392501                                              |
| 22           | 549.589885                     | -76.413649                                      | 0.002423                                                | -76.416443                                              | -76.414020                                              |
| 23           | 2695.951150                    | -76.392856                                      | 0.011907                                                | -76.406547                                              | -76.394641                                              |
| 24           | 1559.022966                    | -76.403924                                      | 0.006884                                                | -76.411842                                              | -76.404960                                              |
| 25           | 467.747909                     | -76.414429                                      | 0.002061                                                | -76.416808                                              | -76.414748                                              |
| 26           | 1012.207299                    | -76.409205                                      | 0.004488                                                | -76.414329                                              | -76.409841                                              |
| 27           | 3201.477583                    | -76.387872                                      | 0.014196                                                | -76.404076                                              | -76.389881                                              |
| 28           | 789.298853                     | -76.411345                                      | 0.003481                                                | -76.415358                                              | -76.411878                                              |
| 29           | 4661.383275                    | -76.373232                                      | 0.020727                                                | -76.396772                                              | -76.376046                                              |
| 30           | 6372.270967                    | -76.354221                                      | 0.028101                                                | -76.386633                                              | -76.358535                                              |
| 31           | 1418.049310                    | -76.405286                                      | 0.006257                                                | -76.412493                                              | -76.406237                                              |
| 32           | 4281.244289                    | -76.377042                                      | 0.018939                                                | -76.398760                                              | -76.379822                                              |
| 33           | 5049.506397                    | -76.369229                                      | 0.022547                                                | -76.394627                                              | -76.372083                                              |
| 34           | 4179.721979                    | -76.377850                                      | 0.018527                                                | -76.399019                                              | -76.380493                                              |
| 35           | 547.907468                     | -76.413660                                      | 0.002417                                                | -76.416446                                              | -76.414029                                              |
| 36           | 3379.384684                    | -76.386144                                      | 0.014892                                                | -76.403321                                              | -76.388431                                              |
| 37           | 7220.628161                    | -76.346267                                      | 0.032399                                                | -76.382415                                              | -76.350019                                              |
| 38           | 2955.958697                    | -76.390300                                      | 0.013120                                                | -76.405242                                              | -76.392124                                              |
| 39           | 4352.087788                    | -76.376417                                      | 0.019231                                                | -76.398494                                              | -76.379265                                              |
| 40           | 3437.303508                    | -76.385556                                      | 0.015274                                                | -76.402920                                              | -76.387648                                              |
| 41           | 10370.950675                   | -76.310926                                      | 0.046938                                                | -76.362483                                              | -76.315549                                              |
| 42           | 1772.759492                    | -76.401867                                      | 0.007819                                                | -76.410877                                              | -76.403059                                              |
| 43           | 2629.017172                    | -76.393449                                      | 0.011586                                                | -76.406822                                              | -76.395238                                              |
| 44           | 1745.959868                    | -76.402125                                      | 0.007716                                                | -76.410984                                              | -76.403270                                              |
| 45           | 1835.608640                    | -76.401258                                      | 0.008085                                                | -76.410599                                              | -76.402515                                              |
| 46           | 14096.703269                   | -76.264856                                      | 0.062834                                                | -76.335880                                              | -76.273052                                              |
| 47           | 2363.561500                    | -76.396067                                      | 0.010451                                                | -76.408058                                              | -76.397608                                              |
| 48           | 9885.165643                    | -76.315232                                      | 0.044663                                                | -76.364461                                              | -76.319803                                              |
| 49           | 11118.135359                   | -76.296954                                      | 0.049428                                                | -76.353086                                              | -76.303663                                              |

|    |  |             |            |          |            |            |
|----|--|-------------|------------|----------|------------|------------|
| 50 |  | 2793.732543 | -76.391847 | 0.012290 | -76.406080 | -76.393791 |
|----|--|-------------|------------|----------|------------|------------|

---



## 1.2 SPC/Fw

Table 6: Isobaric heat capacities for bulk water. The data is depicted as Figure 6. in the main text.

| $T / \text{K}$ | $c_p / \text{J}\cdot\text{K}^{-1}\text{mol}^{-1}$ |          |           |                   |                    |                 |
|----------------|---------------------------------------------------|----------|-----------|-------------------|--------------------|-----------------|
|                | exp.                                              | class HO | quant. HO | class. sim.       | 1PT                | GSTA            |
| 25             | 3.079                                             | 74.826   | 2.768     | $75.321\pm 0.044$ | $0.7187\pm 0.0078$ | $3.80\pm 0.15$  |
| 50             | 7.875                                             | 74.826   | 6.992     | $75.961\pm 0.058$ | $1.579\pm 0.013$   | $8.38\pm 0.25$  |
| 100            | 15.735                                            | 74.826   | 13.667    | $77.438\pm 0.086$ | $3.170\pm 0.022$   | $17.28\pm 0.35$ |
| 150            | 22.071                                            | 74.826   | 19.303    | $79.10\pm 0.10$   | $5.783\pm 0.031$   | $24.53\pm 0.33$ |
| 200            | 28.230                                            | 74.826   | 24.429    | $81.30\pm 0.16$   | $10.314\pm 0.058$  | $33.61\pm 0.46$ |
| 273.15         | 75.917                                            | 74.826   | 31.020    | $110.35\pm 0.74$  | $20.689\pm 0.090$  | $72.3\pm 1.0$   |
| 298.15         | 75.375                                            | 74.826   | 32.964    | $109.27\pm 0.42$  | $23.097\pm 0.077$  | $72.64\pm 0.57$ |
| 323.15         | 75.277                                            | 74.826   | 34.752    | $107.31\pm 0.61$  | $25.206\pm 0.076$  | $72.19\pm 0.82$ |
| 348.15         | 75.521                                            | 74.826   | 36.392    | $107.05\pm 0.57$  | $27.162\pm 0.083$  | $73.65\pm 0.79$ |
| 373.15         | 75.993                                            | 74.826   | 37.895    | $105.98\pm 0.45$  | $28.641\pm 0.080$  | $72.74\pm 0.67$ |
| 400            | 35.982                                            | 58.198   | 34.742    | $56.93\pm 0.30$   | $50.85\pm 0.21$    | $40.46\pm 0.42$ |
| 500            | 35.699                                            | 58.198   | 35.912    | $55.77\pm 0.32$   | $50.58\pm 0.21$    | $38.16\pm 0.19$ |
| 600            | 36.521                                            | 58.198   | 37.086    | $54.94\pm 0.20$   | $52.93\pm 0.18$    | $39.73\pm 0.21$ |
| 700            | 37.596                                            | 58.198   | 38.250    | $54.88\pm 0.20$   | $54.20\pm 0.16$    | $41.12\pm 0.23$ |
| 800            | 38.780                                            | 58.198   | 39.424    | $55.19\pm 0.16$   | $55.08\pm 0.16$    | $41.85\pm 0.12$ |
| 900            | 40.023                                            | 58.198   | 40.613    | $54.59\pm 0.24$   | $56.89\pm 0.18$    | $42.61\pm 0.20$ |
| 1000           | 41.292                                            | 58.198   | 41.801    | $55.04\pm 0.17$   | $57.72\pm 0.16$    | $43.60\pm 0.14$ |

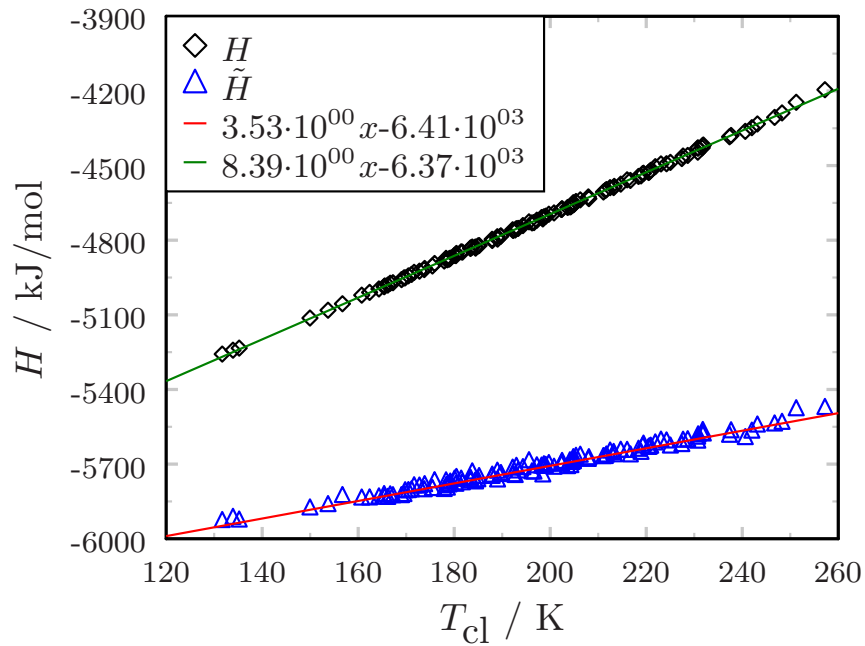

Figure 5: Classic and smoothed enthalpy (for ice at 200 K) as a function of simulation temperature.

Table 7: Simulation temperature, average enthalpy and smoothed average enthalpy components of trajectories associated to the calculation of ice at 200 K.

| trajectory # | $T_{\text{simul.}}$<br>K | $\langle H \rangle$ | $\langle \tilde{E}_{kin} \rangle$ | $\langle \tilde{E}_{pot} \rangle$<br>kJ/mol | $pV$  | $\langle \tilde{H} \rangle$ |
|--------------|--------------------------|---------------------|-----------------------------------|---------------------------------------------|-------|-----------------------------|
| 1            | 173.842                  | -4913.473           | 227.832                           | -6027.933                                   | 0.193 | -5799.908                   |
| 2            | 184.449                  | -4831.896           | 233.174                           | -6022.647                                   | 0.192 | -5789.281                   |
| 3            | 173.763                  | -4918.117           | 219.663                           | -6039.935                                   | 0.193 | -5820.079                   |
| 4            | 193.329                  | -4752.560           | 248.973                           | -5994.896                                   | 0.195 | -5745.728                   |
| 5            | 192.273                  | -4760.814           | 241.639                           | -6002.849                                   | 0.195 | -5761.015                   |
| 6            | 196.202                  | -4730.455           | 246.145                           | -5996.196                                   | 0.195 | -5749.856                   |
| 7            | 204.301                  | -4665.358           | 258.060                           | -5983.364                                   | 0.194 | -5725.109                   |
| 8            | 189.735                  | -4782.629           | 245.219                           | -6001.752                                   | 0.195 | -5756.339                   |
| 9            | 160.733                  | -5020.859           | 203.668                           | -6056.820                                   | 0.194 | -5852.957                   |
| 10           | 220.502                  | -4527.844           | 288.196                           | -5940.972                                   | 0.194 | -5652.582                   |
| 11           | 207.945                  | -4625.961           | 266.207                           | -5966.443                                   | 0.196 | -5700.039                   |
| 12           | 199.714                  | -4695.534           | 259.964                           | -5976.727                                   | 0.195 | -5716.568                   |
| 13           | 204.817                  | -4649.202           | 267.705                           | -5960.787                                   | 0.197 | -5692.886                   |
| 14           | 180.458                  | -4853.180           | 237.208                           | -6008.922                                   | 0.196 | -5771.518                   |
| 15           | 211.478                  | -4600.041           | 270.936                           | -5960.328                                   | 0.195 | -5689.198                   |
| 16           | 169.536                  | -4951.608           | 210.091                           | -6049.478                                   | 0.194 | -5839.194                   |
| 17           | 169.024                  | -4958.438           | 209.301                           | -6053.234                                   | 0.193 | -5843.739                   |
| 18           | 227.669                  | -4461.696           | 296.819                           | -5921.762                                   | 0.195 | -5624.747                   |
| 19           | 208.047                  | -4632.879           | 272.554                           | -5965.743                                   | 0.194 | -5692.996                   |
| 20           | 231.780                  | -4419.462           | 310.041                           | -5896.269                                   | 0.196 | -5586.032                   |
| 21           | 218.392                  | -4543.676           | 284.791                           | -5945.442                                   | 0.194 | -5660.458                   |
| 22           | 183.757                  | -4827.546           | 248.419                           | -5997.894                                   | 0.194 | -5749.281                   |
| 23           | 212.472                  | -4588.847           | 280.090                           | -5947.439                                   | 0.196 | -5667.153                   |
| 24           | 241.995                  | -4347.725           | 313.277                           | -5901.816                                   | 0.194 | -5588.345                   |
| 25           | 153.714                  | -5081.492           | 194.098                           | -6073.278                                   | 0.192 | -5878.988                   |
| 26           | 221.883                  | -4504.345           | 290.824                           | -5926.221                                   | 0.196 | -5635.201                   |
| 27           | 243.152                  | -4332.782           | 322.169                           | -5887.016                                   | 0.195 | -5564.653                   |
| 28           | 187.900                  | -4796.274           | 238.826                           | -6006.627                                   | 0.195 | -5767.605                   |
| 29           | 196.612                  | -4729.209           | 247.894                           | -5998.826                                   | 0.194 | -5750.738                   |
| 30           | 169.782                  | -4951.332           | 218.476                           | -6042.503                                   | 0.193 | -5823.833                   |
| 31           | 216.016                  | -4557.299           | 279.596                           | -5944.660                                   | 0.196 | -5664.868                   |
| 32           | 177.919                  | -4883.655           | 217.808                           | -6037.644                                   | 0.194 | -5819.642                   |
| 33           | 230.806                  | -4429.462           | 304.364                           | -5907.117                                   | 0.197 | -5602.556                   |
| 34           | 167.240                  | -4970.872           | 208.400                           | -6052.801                                   | 0.193 | -5844.207                   |
| 35           | 248.285                  | -4288.396           | 325.834                           | -5879.812                                   | 0.196 | -5553.783                   |
| 36           | 185.186                  | -4821.460           | 240.896                           | -6009.187                                   | 0.194 | -5768.097                   |
| 37           | 218.908                  | -4541.521           | 278.748                           | -5951.506                                   | 0.195 | -5672.563                   |
| 38           | 192.705                  | -4758.877           | 241.096                           | -6005.770                                   | 0.194 | -5764.481                   |
| 39           | 251.238                  | -4245.656           | 342.735                           | -5841.832                                   | 0.198 | -5498.899                   |
| 40           | 189.650                  | -4784.185           | 244.361                           | -6003.627                                   | 0.194 | -5759.072                   |
| 41           | 220.683                  | -4524.924           | 288.473                           | -5939.768                                   | 0.194 | -5651.101                   |
| 42           | 178.578                  | -4878.558           | 221.297                           | -6035.381                                   | 0.194 | -5813.890                   |
| 43           | 230.733                  | -4446.264           | 298.431                           | -5927.487                                   | 0.193 | -5628.863                   |
| 44           | 184.923                  | -4823.348           | 234.557                           | -6015.973                                   | 0.194 | -5781.222                   |
| 45           | 206.254                  | -4637.905           | 271.867                           | -5955.603                                   | 0.196 | -5683.540                   |
| 46           | 198.686                  | -4706.071           | 258.170                           | -5980.023                                   | 0.195 | -5721.658                   |
| 47           | 187.917                  | -4801.263           | 244.382                           | -6006.927                                   | 0.193 | -5762.352                   |
| 48           | 171.125                  | -4937.463           | 217.736                           | -6038.504                                   | 0.194 | -5820.575                   |

|     |         |           |         |           |       |           |
|-----|---------|-----------|---------|-----------|-------|-----------|
| 49  | 179.183 | -4872.211 | 232.478 | -6022.377 | 0.194 | -5789.705 |
| 50  | 204.541 | -4659.813 | 262.731 | -5975.440 | 0.195 | -5712.514 |
| 51  | 171.649 | -4929.086 | 224.265 | -6029.028 | 0.194 | -5804.569 |
| 52  | 178.301 | -4872.906 | 231.389 | -6016.706 | 0.195 | -5785.122 |
| 53  | 199.056 | -4703.465 | 257.548 | -5981.840 | 0.195 | -5724.098 |
| 54  | 203.631 | -4668.380 | 254.712 | -5984.038 | 0.195 | -5729.131 |
| 55  | 183.393 | -4833.188 | 236.777 | -6012.333 | 0.194 | -5775.362 |
| 56  | 198.206 | -4708.919 | 255.197 | -5982.400 | 0.195 | -5727.008 |
| 57  | 237.671 | -4378.996 | 312.302 | -5900.383 | 0.195 | -5587.886 |
| 58  | 181.712 | -4847.912 | 228.959 | -6022.077 | 0.195 | -5792.923 |
| 59  | 194.313 | -4741.177 | 253.778 | -5986.408 | 0.195 | -5732.435 |
| 60  | 213.210 | -4588.502 | 279.880 | -5952.474 | 0.194 | -5672.399 |
| 61  | 228.642 | -4459.312 | 300.915 | -5922.985 | 0.195 | -5621.875 |
| 62  | 149.953 | -5112.827 | 188.800 | -6081.280 | 0.192 | -5892.287 |
| 63  | 198.625 | -4709.528 | 257.289 | -5985.248 | 0.193 | -5727.765 |
| 64  | 213.331 | -4583.615 | 273.460 | -5955.454 | 0.196 | -5681.799 |
| 65  | 204.109 | -4666.069 | 267.928 | -5973.561 | 0.194 | -5705.439 |
| 66  | 257.219 | -4195.108 | 341.719 | -5835.916 | 0.199 | -5493.999 |
| 67  | 135.210 | -5233.710 | 168.533 | -6108.522 | 0.192 | -5939.797 |
| 68  | 166.159 | -4980.467 | 206.200 | -6057.118 | 0.193 | -5850.725 |
| 69  | 224.225 | -4492.610 | 297.014 | -5924.505 | 0.195 | -5627.296 |
| 70  | 192.953 | -4753.579 | 257.633 | -5985.221 | 0.194 | -5727.395 |
| 71  | 180.342 | -4862.024 | 227.303 | -6026.411 | 0.195 | -5798.913 |
| 72  | 202.326 | -4676.215 | 260.469 | -5976.732 | 0.196 | -5716.068 |
| 73  | 156.716 | -5055.534 | 210.774 | -6053.276 | 0.193 | -5842.309 |
| 74  | 216.691 | -4559.759 | 274.018 | -5957.169 | 0.194 | -5682.957 |
| 75  | 227.412 | -4471.872 | 292.022 | -5934.019 | 0.194 | -5641.802 |
| 76  | 246.734 | -4306.325 | 325.113 | -5885.298 | 0.194 | -5559.990 |
| 77  | 181.454 | -4846.683 | 233.744 | -6012.503 | 0.195 | -5778.563 |
| 78  | 204.838 | -4657.430 | 265.080 | -5974.613 | 0.195 | -5709.338 |
| 79  | 195.580 | -4726.201 | 265.763 | -5970.628 | 0.195 | -5704.670 |
| 80  | 184.404 | -4827.283 | 232.189 | -6018.044 | 0.194 | -5785.660 |
| 81  | 231.892 | -4417.414 | 302.887 | -5903.221 | 0.197 | -5600.137 |
| 82  | 175.461 | -4903.691 | 220.946 | -6037.237 | 0.193 | -5816.098 |
| 83  | 166.666 | -4972.944 | 209.303 | -6050.079 | 0.194 | -5840.582 |
| 84  | 175.910 | -4893.599 | 233.477 | -6017.788 | 0.194 | -5784.117 |
| 85  | 165.404 | -4986.973 | 211.962 | -6051.573 | 0.193 | -5839.419 |
| 86  | 197.210 | -4719.583 | 257.383 | -5983.477 | 0.195 | -5725.899 |
| 87  | 231.659 | -4428.782 | 309.614 | -5906.593 | 0.195 | -5596.784 |
| 88  | 219.428 | -4530.818 | 291.724 | -5931.867 | 0.195 | -5639.948 |
| 89  | 214.684 | -4574.651 | 283.370 | -5947.756 | 0.194 | -5664.191 |
| 90  | 170.458 | -4943.366 | 217.458 | -6041.331 | 0.194 | -5823.679 |
| 91  | 192.177 | -4758.126 | 252.575 | -5987.621 | 0.195 | -5734.851 |
| 92  | 237.349 | -4384.282 | 303.662 | -5909.641 | 0.195 | -5605.784 |
| 93  | 179.017 | -4875.121 | 228.891 | -6025.732 | 0.193 | -5796.648 |
| 94  | 219.278 | -4532.268 | 288.972 | -5935.730 | 0.195 | -5646.563 |
| 95  | 198.455 | -4714.443 | 241.146 | -6003.828 | 0.194 | -5762.488 |
| 96  | 205.027 | -4653.779 | 270.054 | -5966.441 | 0.195 | -5696.192 |
| 97  | 133.918 | -5242.103 | 173.289 | -6101.924 | 0.192 | -5928.444 |
| 98  | 172.755 | -4924.445 | 226.293 | -6031.909 | 0.193 | -5805.423 |
| 99  | 178.369 | -4877.307 | 224.884 | -6028.564 | 0.194 | -5803.486 |
| 100 | 164.315 | -4996.013 | 207.272 | -6056.070 | 0.193 | -5848.606 |
| 101 | 225.031 | -4487.208 | 287.618 | -5935.935 | 0.196 | -5648.121 |
| 102 | 189.030 | -4795.656 | 236.058 | -6017.589 | 0.193 | -5781.338 |

|     |         |           |         |           |       |           |
|-----|---------|-----------|---------|-----------|-------|-----------|
| 103 | 205.363 | -4644.404 | 269.895 | -5958.323 | 0.196 | -5688.232 |
| 104 | 211.079 | -4606.193 | 272.965 | -5962.373 | 0.194 | -5689.213 |
| 105 | 204.864 | -4654.241 | 266.285 | -5969.756 | 0.195 | -5703.277 |
| 106 | 188.985 | -4785.932 | 248.459 | -5995.523 | 0.194 | -5746.869 |
| 107 | 165.526 | -4983.896 | 205.750 | -6055.202 | 0.194 | -5849.258 |
| 108 | 230.712 | -4429.675 | 298.431 | -5910.660 | 0.197 | -5612.032 |
| 109 | 220.931 | -4519.250 | 287.248 | -5936.258 | 0.195 | -5648.815 |
| 110 | 183.412 | -4831.074 | 230.599 | -6014.892 | 0.196 | -5784.097 |
| 111 | 200.792 | -4690.299 | 254.053 | -5986.179 | 0.195 | -5731.931 |
| 112 | 162.376 | -5009.690 | 204.030 | -6057.817 | 0.193 | -5853.594 |
| 113 | 178.898 | -4875.414 | 227.168 | -6028.666 | 0.194 | -5801.305 |
| 114 | 202.465 | -4673.128 | 263.949 | -5972.474 | 0.195 | -5708.330 |
| 115 | 211.703 | -4596.578 | 273.718 | -5956.762 | 0.195 | -5682.849 |
| 116 | 180.079 | -4860.881 | 236.251 | -6014.022 | 0.194 | -5777.577 |
| 117 | 131.675 | -5257.700 | 166.486 | -6108.163 | 0.193 | -5941.484 |
| 118 | 202.380 | -4676.373 | 259.174 | -5979.102 | 0.195 | -5719.733 |
| 119 | 223.067 | -4493.392 | 296.262 | -5920.230 | 0.196 | -5623.771 |
| 120 | 240.626 | -4362.442 | 302.307 | -5917.661 | 0.195 | -5615.159 |

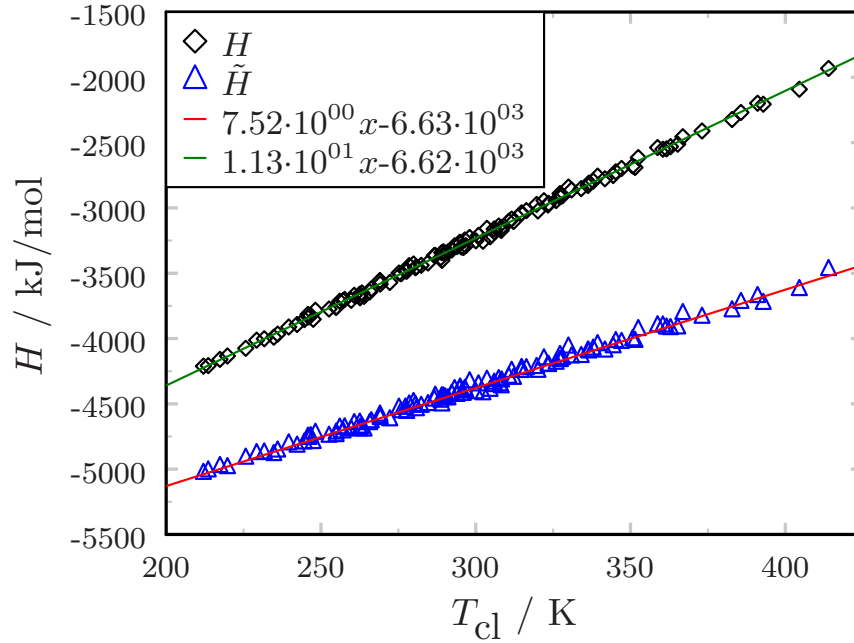

Figure 6: Classic and smoothed enthalpy (for water at 298 K) as a function of simulation temperature.

Table 8: Simulation temperature, average enthalpy and smoothed average enthalpy components of trajectories associated to the calculation of liquid water at 298 K.

| trajectory # | $T_{\text{simul.}}$<br>K | $\langle H \rangle$ | $\langle \tilde{E}_{kin} \rangle$ | $\langle \tilde{E}_{pot} \rangle$<br>kJ/mol | $pV$  | $\langle \tilde{H} \rangle$ |
|--------------|--------------------------|---------------------|-----------------------------------|---------------------------------------------|-------|-----------------------------|
| 1            | 307.835                  | -3162.206           | 585.343                           | -4952.010                                   | 0.188 | -4366.478                   |
| 2            | 308.359                  | -3150.129           | 596.075                           | -4933.913                                   | 0.189 | -4337.649                   |
| 3            | 336.268                  | -2828.335           | 657.556                           | -4765.978                                   | 0.188 | -4108.234                   |
| 4            | 252.611                  | -3774.111           | 481.489                           | -5241.123                                   | 0.182 | -4759.451                   |

|    |         |           |         |           |       |           |
|----|---------|-----------|---------|-----------|-------|-----------|
| 5  | 254.891 | -3762.387 | 486.578 | -5242.027 | 0.190 | -4755.259 |
| 6  | 300.893 | -3210.106 | 582.781 | -4950.254 | 0.190 | -4367.283 |
| 7  | 350.688 | -2678.919 | 680.624 | -4703.671 | 0.192 | -4022.855 |
| 8  | 289.539 | -3335.833 | 555.239 | -5014.808 | 0.188 | -4459.381 |
| 9  | 263.933 | -3676.990 | 499.797 | -5212.503 | 0.186 | -4712.521 |
| 10 | 361.633 | -2547.799 | 703.618 | -4636.248 | 0.192 | -3932.438 |
| 11 | 265.754 | -3643.048 | 515.082 | -5178.171 | 0.187 | -4662.902 |
| 12 | 344.391 | -2751.782 | 666.863 | -4743.147 | 0.190 | -4076.094 |
| 13 | 290.074 | -3348.092 | 558.160 | -5031.509 | 0.188 | -4473.161 |
| 14 | 323.558 | -2965.447 | 619.414 | -4839.269 | 0.190 | -4219.665 |
| 15 | 231.684 | -4001.624 | 451.602 | -5338.506 | 0.185 | -4886.719 |
| 16 | 277.288 | -3481.563 | 538.139 | -5082.920 | 0.188 | -4544.593 |
| 17 | 262.668 | -3682.517 | 504.367 | -5203.037 | 0.184 | -4698.486 |
| 18 | 293.973 | -3296.012 | 558.088 | -5006.240 | 0.188 | -4447.964 |
| 19 | 284.579 | -3421.314 | 550.258 | -5068.183 | 0.184 | -4517.740 |
| 20 | 319.668 | -2973.247 | 602.726 | -4837.727 | 0.189 | -4234.812 |
| 21 | 300.042 | -3251.965 | 569.161 | -4996.838 | 0.185 | -4427.492 |
| 22 | 234.765 | -3989.659 | 451.195 | -5350.427 | 0.186 | -4899.047 |
| 23 | 362.919 | -2531.071 | 697.656 | -4635.031 | 0.195 | -3937.180 |
| 24 | 327.360 | -2912.130 | 628.244 | -4809.492 | 0.189 | -4181.059 |
| 25 | 347.112 | -2697.667 | 665.988 | -4709.437 | 0.196 | -4043.253 |
| 26 | 382.803 | -2323.245 | 738.289 | -4539.802 | 0.195 | -3801.317 |
| 27 | 391.047 | -2198.610 | 761.245 | -4454.012 | 0.201 | -3692.567 |
| 28 | 280.525 | -3457.837 | 548.607 | -5073.731 | 0.187 | -4524.937 |
| 29 | 345.234 | -2723.579 | 674.812 | -4711.616 | 0.192 | -4036.611 |
| 30 | 373.104 | -2410.959 | 720.999 | -4571.880 | 0.201 | -3850.679 |
| 31 | 311.603 | -3085.598 | 613.618 | -4877.283 | 0.191 | -4263.474 |
| 32 | 294.841 | -3263.700 | 568.115 | -4970.209 | 0.186 | -4401.909 |
| 33 | 282.390 | -3439.643 | 544.094 | -5075.115 | 0.184 | -4530.836 |
| 34 | 358.733 | -2537.651 | 694.208 | -4610.384 | 0.193 | -3915.983 |
| 35 | 229.218 | -4012.390 | 444.432 | -5336.507 | 0.188 | -4891.888 |
| 36 | 327.218 | -2890.250 | 636.638 | -4779.120 | 0.191 | -4142.291 |
| 37 | 323.331 | -2977.951 | 628.081 | -4844.779 | 0.190 | -4216.507 |
| 38 | 279.914 | -3429.180 | 542.443 | -5045.081 | 0.187 | -4502.451 |
| 39 | 310.674 | -3101.978 | 593.333 | -4902.530 | 0.187 | -4309.009 |
| 40 | 262.606 | -3687.930 | 501.409 | -5212.057 | 0.182 | -4710.467 |
| 41 | 272.241 | -3570.714 | 516.931 | -5151.669 | 0.188 | -4634.551 |
| 42 | 296.806 | -3288.956 | 580.214 | -4998.905 | 0.186 | -4418.504 |
| 43 | 292.237 | -3322.292 | 570.858 | -5009.462 | 0.184 | -4438.419 |
| 44 | 306.025 | -3183.820 | 586.305 | -4959.520 | 0.188 | -4373.026 |
| 45 | 336.532 | -2810.442 | 645.044 | -4761.459 | 0.194 | -4116.221 |
| 46 | 385.676 | -2269.316 | 754.037 | -4491.604 | 0.202 | -3737.365 |
| 47 | 298.024 | -3226.023 | 591.540 | -4934.824 | 0.184 | -4343.100 |
| 48 | 236.017 | -3966.202 | 456.784 | -5329.615 | 0.183 | -4872.648 |
| 49 | 366.900 | -2454.715 | 731.412 | -4553.786 | 0.196 | -3822.178 |
| 50 | 225.697 | -4074.793 | 444.188 | -5371.311 | 0.181 | -4926.942 |
| 51 | 329.944 | -2840.122 | 652.065 | -4730.311 | 0.193 | -4078.053 |
| 52 | 239.603 | -3911.605 | 471.412 | -5289.374 | 0.187 | -4817.775 |
| 53 | 289.085 | -3401.692 | 556.117 | -5077.030 | 0.188 | -4520.726 |
| 54 | 269.068 | -3561.347 | 520.426 | -5117.766 | 0.187 | -4597.153 |
| 55 | 308.237 | -3172.430 | 583.683 | -4965.588 | 0.187 | -4381.718 |
| 56 | 278.519 | -3441.538 | 534.097 | -5055.249 | 0.186 | -4520.966 |
| 57 | 325.969 | -2943.607 | 628.248 | -4830.639 | 0.187 | -4202.203 |
| 58 | 334.071 | -2852.193 | 639.959 | -4790.690 | 0.192 | -4150.540 |

|     |         |           |         |           |       |           |
|-----|---------|-----------|---------|-----------|-------|-----------|
| 59  | 413.978 | -1932.194 | 820.104 | -4305.999 | 0.207 | -3485.688 |
| 60  | 260.753 | -3668.719 | 508.466 | -5171.045 | 0.186 | -4662.394 |
| 61  | 352.505 | -2614.502 | 694.709 | -4639.476 | 0.198 | -3944.569 |
| 62  | 293.179 | -3289.878 | 572.701 | -4976.575 | 0.186 | -4403.688 |
| 63  | 213.589 | -4207.351 | 415.773 | -5439.783 | 0.186 | -5023.824 |
| 64  | 360.451 | -2550.450 | 708.576 | -4626.063 | 0.193 | -3917.294 |
| 65  | 290.120 | -3345.797 | 557.847 | -5024.998 | 0.183 | -4466.969 |
| 66  | 266.255 | -3620.086 | 511.693 | -5160.538 | 0.189 | -4648.655 |
| 67  | 275.198 | -3498.754 | 538.279 | -5082.928 | 0.187 | -4544.462 |
| 68  | 256.068 | -3714.749 | 495.478 | -5192.975 | 0.185 | -4697.312 |
| 69  | 302.339 | -3255.285 | 576.991 | -5012.846 | 0.188 | -4435.667 |
| 70  | 351.457 | -2690.077 | 683.063 | -4718.210 | 0.191 | -4034.956 |
| 71  | 246.662 | -3823.014 | 480.477 | -5243.169 | 0.188 | -4762.505 |
| 72  | 259.778 | -3707.525 | 500.555 | -5211.279 | 0.190 | -4710.533 |
| 73  | 288.714 | -3381.062 | 557.396 | -5049.434 | 0.183 | -4491.855 |
| 74  | 262.550 | -3660.815 | 514.830 | -5173.714 | 0.185 | -4658.699 |
| 75  | 269.057 | -3555.452 | 509.078 | -5121.315 | 0.187 | -4612.049 |
| 76  | 339.368 | -2756.469 | 657.300 | -4717.087 | 0.192 | -4059.594 |
| 77  | 330.980 | -2862.197 | 630.987 | -4785.183 | 0.186 | -4154.011 |
| 78  | 280.842 | -3451.061 | 531.118 | -5088.009 | 0.190 | -4556.700 |
| 79  | 392.882 | -2206.087 | 746.141 | -4491.388 | 0.200 | -3745.048 |
| 80  | 365.248 | -2512.240 | 698.473 | -4631.337 | 0.195 | -3932.670 |
| 81  | 246.087 | -3834.301 | 479.147 | -5254.933 | 0.186 | -4775.600 |
| 82  | 303.619 | -3156.364 | 582.576 | -4914.733 | 0.193 | -4331.964 |
| 83  | 248.214 | -3783.578 | 481.302 | -5217.825 | 0.188 | -4736.335 |
| 84  | 295.377 | -3299.316 | 570.356 | -5008.410 | 0.188 | -4437.866 |
| 85  | 316.366 | -3020.682 | 607.998 | -4852.092 | 0.189 | -4243.905 |
| 86  | 277.716 | -3484.891 | 525.534 | -5103.411 | 0.185 | -4577.692 |
| 87  | 242.294 | -3892.281 | 462.352 | -5298.135 | 0.185 | -4835.597 |
| 88  | 327.161 | -2915.198 | 630.387 | -4810.928 | 0.190 | -4180.350 |
| 89  | 312.211 | -3104.108 | 596.860 | -4914.191 | 0.189 | -4317.142 |
| 90  | 296.471 | -3245.336 | 564.962 | -4967.096 | 0.187 | -4401.947 |
| 91  | 257.159 | -3709.188 | 483.348 | -5209.772 | 0.190 | -4726.234 |
| 92  | 263.227 | -3650.907 | 496.396 | -5186.025 | 0.184 | -4689.444 |
| 93  | 404.535 | -2091.519 | 786.877 | -4425.802 | 0.199 | -3638.727 |
| 94  | 307.432 | -3138.813 | 592.024 | -4919.075 | 0.186 | -4326.865 |
| 95  | 254.938 | -3757.612 | 494.066 | -5229.749 | 0.185 | -4735.498 |
| 96  | 296.004 | -3303.243 | 572.277 | -5012.106 | 0.189 | -4439.640 |
| 97  | 322.040 | -2944.745 | 630.644 | -4798.483 | 0.189 | -4167.650 |
| 98  | 294.966 | -3264.629 | 575.211 | -4966.393 | 0.188 | -4390.995 |
| 99  | 314.822 | -3037.854 | 613.243 | -4854.649 | 0.192 | -4241.215 |
| 100 | 269.144 | -3583.120 | 517.330 | -5141.535 | 0.189 | -4624.016 |
| 101 | 320.083 | -3023.590 | 615.110 | -4879.130 | 0.191 | -4263.830 |
| 102 | 212.032 | -4211.474 | 401.948 | -5445.229 | 0.180 | -5043.101 |
| 103 | 247.507 | -3852.922 | 477.722 | -5285.764 | 0.187 | -4807.855 |
| 104 | 341.725 | -2776.979 | 652.345 | -4761.522 | 0.191 | -4108.985 |
| 105 | 275.912 | -3504.185 | 530.195 | -5102.918 | 0.186 | -4572.536 |
| 106 | 244.661 | -3855.208 | 465.800 | -5276.958 | 0.187 | -4810.970 |
| 107 | 219.800 | -4133.563 | 414.879 | -5413.956 | 0.184 | -4998.892 |
| 108 | 291.045 | -3337.710 | 553.617 | -5028.078 | 0.184 | -4474.278 |
| 109 | 277.612 | -3474.493 | 521.786 | -5094.717 | 0.186 | -4572.745 |
| 110 | 245.806 | -3815.481 | 471.820 | -5238.946 | 0.185 | -4766.941 |
| 111 | 304.641 | -3221.322 | 580.791 | -4990.218 | 0.185 | -4409.241 |
| 112 | 314.713 | -3043.357 | 601.856 | -4867.148 | 0.189 | -4265.103 |

|     |         |           |         |           |       |           |
|-----|---------|-----------|---------|-----------|-------|-----------|
| 113 | 217.377 | -4159.517 | 422.876 | -5413.482 | 0.186 | -4990.420 |
| 114 | 286.934 | -3363.963 | 561.047 | -5014.981 | 0.188 | -4453.746 |
| 115 | 257.654 | -3700.400 | 496.470 | -5192.483 | 0.188 | -4695.825 |
| 116 | 286.634 | -3363.781 | 546.274 | -5029.739 | 0.186 | -4483.279 |
| 117 | 289.030 | -3342.901 | 557.636 | -5016.137 | 0.188 | -4458.313 |
| 118 | 337.971 | -2795.042 | 654.691 | -4748.510 | 0.192 | -4093.627 |
| 119 | 305.955 | -3161.124 | 583.363 | -4938.036 | 0.188 | -4354.485 |
| 120 | 328.022 | -2907.402 | 634.853 | -4800.676 | 0.192 | -4165.631 |

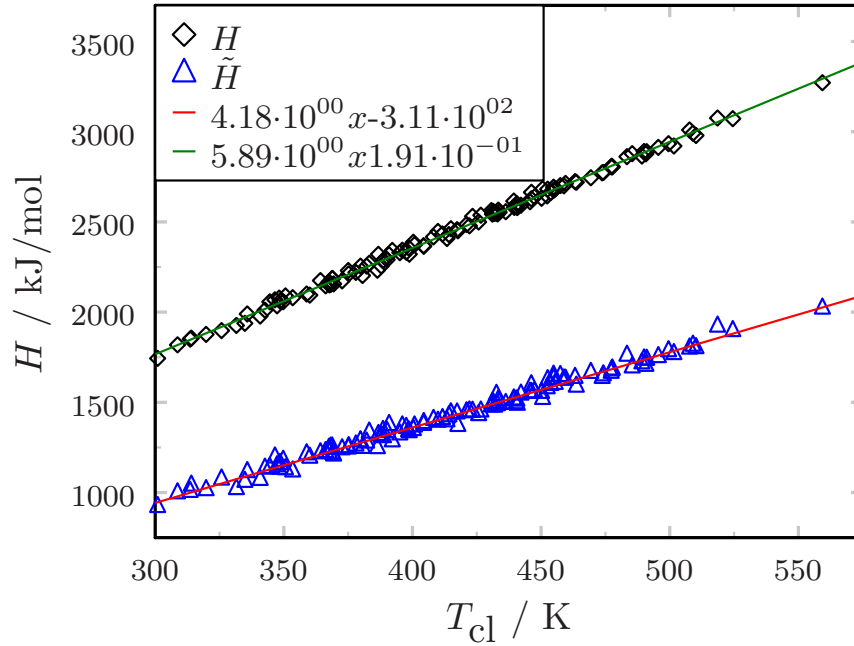

Figure 7: Classic and smoothed enthalpy (for water vapor at 400 K) as a function of simulation temperature.

Table 9: Simulation temperature, average enthalpy and smoothed average enthalpy components of trajectories associated to the calculation of water vapor at 400 K.

| trajectory # | $T_{\text{simul.}}$<br>K | $\langle H \rangle$ | $\langle \tilde{E}_{kin} \rangle$ | $\langle \tilde{E}_{pot} \rangle$<br>kJ/mol | $pV$    | $\langle \tilde{H} \rangle$ |
|--------------|--------------------------|---------------------|-----------------------------------|---------------------------------------------|---------|-----------------------------|
| 1            | 450.577                  | 2683.102            | 1156.667                          | -8.783                                      | 372.381 | 1520.265                    |
| 2            | 392.149                  | 2341.960            | 984.321                           | -18.530                                     | 319.522 | 1285.313                    |
| 3            | 350.634                  | 2089.687            | 873.282                           | -24.908                                     | 282.107 | 1130.481                    |
| 4            | 417.642                  | 2450.733            | 1070.968                          | -43.776                                     | 343.303 | 1370.495                    |
| 5            | 353.438                  | 2079.775            | 882.256                           | -47.938                                     | 284.038 | 1118.356                    |
| 6            | 331.555                  | 1926.185            | 826.437                           | -70.258                                     | 264.345 | 1020.525                    |
| 7            | 446.243                  | 2664.062            | 1166.286                          | -9.319                                      | 396.949 | 1553.915                    |
| 8            | 364.224                  | 2174.816            | 926.726                           | -20.158                                     | 312.284 | 1218.851                    |
| 9            | 344.542                  | 2056.985            | 869.001                           | -26.173                                     | 294.901 | 1137.730                    |
| 10           | 386.744                  | 2320.359            | 991.524                           | -9.036                                      | 337.856 | 1320.343                    |
| 11           | 507.707                  | 3009.540            | 1353.512                          | -18.021                                     | 464.042 | 1799.534                    |
| 12           | 430.679                  | 2562.673            | 1119.515                          | -21.719                                     | 381.199 | 1478.995                    |
| 13           | 439.389                  | 2615.586            | 1145.944                          | -17.361                                     | 389.036 | 1517.619                    |
| 14           | 485.406                  | 2878.289            | 1280.496                          | -17.770                                     | 432.307 | 1695.034                    |

|    |         |          |          |         |         |          |
|----|---------|----------|----------|---------|---------|----------|
| 15 | 423.349 | 2530.748 | 1092.405 | -10.722 | 367.677 | 1449.360 |
| 16 | 400.341 | 2387.217 | 1024.390 | -21.162 | 344.761 | 1347.990 |
| 17 | 426.580 | 2537.161 | 1101.880 | -18.694 | 367.403 | 1450.590 |
| 18 | 348.182 | 2077.480 | 870.901  | -27.988 | 290.094 | 1133.007 |
| 19 | 409.907 | 2447.155 | 1054.808 | -19.209 | 358.461 | 1394.060 |
| 20 | 375.062 | 2230.499 | 954.345  | -23.002 | 314.113 | 1245.456 |
| 21 | 368.930 | 2185.615 | 938.018  | -27.102 | 304.991 | 1215.908 |
| 22 | 340.793 | 1978.023 | 861.035  | -58.659 | 269.079 | 1071.455 |
| 23 | 386.366 | 2232.058 | 997.930  | -60.165 | 309.949 | 1247.714 |
| 24 | 334.850 | 1937.806 | 853.091  | -63.051 | 270.716 | 1060.756 |
| 25 | 380.588 | 2202.845 | 991.215  | -61.422 | 319.170 | 1248.963 |
| 26 | 372.650 | 2173.082 | 971.203  | -46.126 | 316.054 | 1241.131 |
| 27 | 398.760 | 2321.011 | 1045.703 | -52.616 | 343.009 | 1336.097 |
| 28 | 474.185 | 2773.785 | 1267.904 | -40.840 | 423.906 | 1650.970 |
| 29 | 433.690 | 2553.415 | 1146.470 | -30.041 | 383.692 | 1500.121 |
| 30 | 422.148 | 2478.056 | 1114.604 | -34.955 | 371.147 | 1450.796 |
| 31 | 413.416 | 2407.988 | 1089.043 | -50.613 | 358.034 | 1396.465 |
| 32 | 360.084 | 2094.057 | 938.664  | -50.481 | 306.493 | 1194.676 |
| 33 | 387.869 | 2255.563 | 1023.366 | -51.393 | 338.055 | 1310.028 |
| 34 | 458.859 | 2699.992 | 1233.744 | -25.004 | 419.238 | 1627.977 |
| 35 | 366.246 | 2145.623 | 952.635  | -37.983 | 311.098 | 1225.751 |
| 36 | 442.155 | 2592.439 | 1181.489 | -28.385 | 391.165 | 1544.269 |
| 37 | 367.543 | 2166.461 | 956.655  | -27.035 | 314.438 | 1244.059 |
| 38 | 453.775 | 2663.448 | 1217.201 | -22.313 | 402.941 | 1597.829 |
| 39 | 367.662 | 2151.077 | 953.828  | -37.828 | 306.854 | 1222.854 |
| 40 | 559.340 | 3271.460 | 1532.201 | -14.954 | 503.616 | 2020.862 |
| 41 | 509.011 | 2991.274 | 1375.543 | -9.714  | 449.425 | 1815.253 |
| 42 | 433.361 | 2565.508 | 1144.752 | -3.022  | 370.535 | 1512.266 |
| 43 | 490.012 | 2890.286 | 1314.307 | -5.853  | 430.682 | 1739.135 |
| 44 | 379.796 | 2254.963 | 980.401  | -2.899  | 308.096 | 1285.598 |
| 45 | 431.396 | 2557.608 | 1132.338 | 1.715   | 360.420 | 1494.473 |
| 46 | 411.685 | 2432.926 | 1075.864 | -11.936 | 344.701 | 1408.629 |
| 47 | 447.449 | 2638.388 | 1185.644 | -10.579 | 382.424 | 1557.489 |
| 48 | 414.931 | 2462.304 | 1089.676 | -1.971  | 352.861 | 1440.566 |
| 49 | 495.559 | 2912.997 | 1330.945 | -11.812 | 432.991 | 1752.124 |
| 50 | 375.213 | 2212.094 | 967.656  | -17.418 | 302.869 | 1253.107 |
| 51 | 436.259 | 2556.563 | 1150.858 | -19.689 | 361.338 | 1492.507 |
| 52 | 477.232 | 2805.226 | 1270.961 | -2.754  | 397.024 | 1665.231 |
| 53 | 408.175 | 2416.938 | 1067.931 | 5.705   | 330.264 | 1403.901 |
| 54 | 491.042 | 2889.286 | 1318.057 | -0.577  | 420.001 | 1737.481 |
| 55 | 368.777 | 2186.549 | 954.674  | -4.787  | 300.934 | 1250.820 |
| 56 | 417.331 | 2456.946 | 1101.286 | -7.657  | 346.161 | 1439.790 |
| 57 | 397.571 | 2332.055 | 1047.435 | -15.554 | 327.780 | 1359.660 |
| 58 | 501.610 | 2920.543 | 1358.977 | -20.137 | 430.098 | 1768.938 |
| 59 | 396.042 | 2342.870 | 1040.406 | -3.636  | 331.129 | 1367.899 |
| 60 | 335.784 | 1989.667 | 857.844  | -11.364 | 268.307 | 1114.787 |
| 61 | 463.186 | 2723.136 | 1243.697 | -5.584  | 398.857 | 1636.970 |
| 62 | 455.475 | 2682.387 | 1217.514 | -4.520  | 390.501 | 1603.495 |
| 63 | 499.524 | 2933.522 | 1352.457 | -3.770  | 436.027 | 1784.714 |
| 64 | 459.478 | 2713.387 | 1229.402 | 1.730   | 396.057 | 1627.190 |
| 65 | 314.043 | 1855.817 | 803.282  | -21.483 | 258.084 | 1039.883 |
| 66 | 368.220 | 2153.389 | 969.030  | -30.037 | 311.556 | 1250.550 |
| 67 | 358.862 | 2100.234 | 940.725  | -33.711 | 306.201 | 1213.215 |
| 68 | 469.329 | 2744.632 | 1270.382 | -23.182 | 417.540 | 1664.739 |



|     |         |          |          |         |         |          |
|-----|---------|----------|----------|---------|---------|----------|
| 69  | 524.506 | 3072.092 | 1435.164 | -14.253 | 475.436 | 1896.347 |
| 70  | 390.157 | 2290.483 | 1027.660 | -30.987 | 339.952 | 1336.625 |
| 71  | 349.753 | 2057.592 | 909.034  | -34.030 | 302.643 | 1177.646 |
| 72  | 452.540 | 2681.193 | 1217.014 | -10.834 | 417.879 | 1624.059 |
| 73  | 383.191 | 2270.506 | 1009.773 | -16.873 | 340.926 | 1333.826 |
| 74  | 457.463 | 2701.258 | 1237.379 | -17.033 | 427.172 | 1647.519 |
| 75  | 483.369 | 2861.692 | 1313.482 | -7.939  | 454.308 | 1759.851 |
| 76  | 390.912 | 2318.069 | 1036.820 | -15.786 | 354.924 | 1375.958 |
| 77  | 518.582 | 3075.653 | 1423.118 | -4.524  | 502.541 | 1921.135 |
| 78  | 346.533 | 2068.264 | 900.377  | -10.946 | 306.400 | 1195.831 |
| 79  | 325.778 | 1897.561 | 844.713  | -46.054 | 274.865 | 1073.523 |
| 80  | 454.840 | 2692.630 | 1232.593 | -2.903  | 419.588 | 1649.278 |
| 81  | 446.178 | 2627.834 | 1204.845 | -8.938  | 400.292 | 1596.198 |
| 82  | 454.920 | 2675.756 | 1231.647 | -6.045  | 404.631 | 1630.233 |
| 83  | 432.623 | 2550.262 | 1164.951 | -5.471  | 383.532 | 1543.011 |
| 84  | 388.538 | 2285.640 | 1027.300 | -15.434 | 331.094 | 1342.960 |
| 85  | 404.384 | 2364.779 | 1070.936 | -21.710 | 337.825 | 1387.051 |
| 86  | 452.362 | 2643.890 | 1212.514 | -18.527 | 385.603 | 1579.590 |
| 87  | 445.701 | 2611.684 | 1190.075 | -19.195 | 382.760 | 1553.639 |
| 88  | 414.172 | 2429.609 | 1095.245 | -21.271 | 350.350 | 1424.325 |
| 89  | 404.318 | 2368.211 | 1063.486 | -25.034 | 338.110 | 1376.562 |
| 90  | 450.183 | 2630.697 | 1197.808 | -17.833 | 373.713 | 1553.688 |
| 91  | 378.006 | 2219.989 | 979.001  | -21.012 | 303.985 | 1261.974 |
| 92  | 369.353 | 2156.389 | 949.952  | -32.352 | 289.121 | 1206.721 |
| 93  | 382.180 | 2254.877 | 985.894  | -15.389 | 307.828 | 1278.333 |
| 94  | 398.484 | 2356.485 | 1029.394 | -11.505 | 323.329 | 1341.218 |
| 95  | 463.677 | 2719.589 | 1223.037 | -13.749 | 379.022 | 1588.310 |
| 96  | 440.754 | 2579.413 | 1154.132 | -17.908 | 351.907 | 1488.132 |
| 97  | 490.721 | 2877.102 | 1306.162 | -6.708  | 404.407 | 1703.860 |
| 98  | 440.390 | 2585.154 | 1154.508 | -10.091 | 352.314 | 1496.731 |
| 99  | 319.775 | 1876.444 | 802.987  | -30.981 | 242.885 | 1014.891 |
| 100 | 425.708 | 2499.663 | 1107.438 | -11.105 | 334.193 | 1430.526 |
| 101 | 440.557 | 2600.686 | 1154.697 | -3.388  | 360.448 | 1511.756 |
| 102 | 395.086 | 2329.307 | 1020.976 | -15.452 | 317.973 | 1323.498 |
| 103 | 431.945 | 2546.960 | 1131.610 | -11.194 | 357.242 | 1477.658 |
| 104 | 313.587 | 1850.264 | 787.171  | -28.931 | 246.893 | 1005.133 |
| 105 | 388.738 | 2286.577 | 1010.596 | -24.444 | 322.268 | 1308.420 |
| 106 | 431.078 | 2543.082 | 1140.096 | -12.037 | 369.639 | 1497.698 |
| 107 | 421.020 | 2485.729 | 1103.956 | -15.180 | 357.547 | 1446.323 |
| 108 | 400.787 | 2373.665 | 1042.975 | -13.541 | 338.191 | 1367.625 |
| 109 | 477.471 | 2808.722 | 1276.601 | -9.679  | 412.025 | 1678.947 |
| 110 | 433.065 | 2544.046 | 1141.381 | -14.318 | 359.038 | 1486.101 |
| 111 | 473.736 | 2771.914 | 1259.742 | -15.960 | 393.019 | 1636.801 |
| 112 | 300.947 | 1743.588 | 749.755  | -50.537 | 221.978 | 921.196  |
| 113 | 439.606 | 2580.151 | 1162.035 | -16.094 | 367.405 | 1513.346 |
| 114 | 308.671 | 1818.591 | 779.708  | -26.884 | 244.310 | 997.134  |
| 115 | 477.672 | 2804.380 | 1282.118 | -7.235  | 408.443 | 1683.327 |
| 116 | 342.660 | 2010.698 | 883.386  | -23.361 | 273.935 | 1133.960 |
| 117 | 510.199 | 2978.893 | 1379.321 | -14.732 | 437.316 | 1801.905 |
| 118 | 348.530 | 2061.333 | 893.830  | -15.359 | 281.333 | 1159.804 |
| 119 | 489.190 | 2864.839 | 1313.558 | -13.075 | 417.027 | 1717.510 |
| 120 | 347.366 | 2034.824 | 896.099  | -23.655 | 275.078 | 1147.522 |

## 2 PIMD simulations

The results of the  $N, p, T$  PIMD simulations with 32 beads are collected in Figure 8 and Table 10. The enthalpy changes linearly with the temperature, therefore the heat capacity is constant, 79.6 J/K/mol in this temperature range.

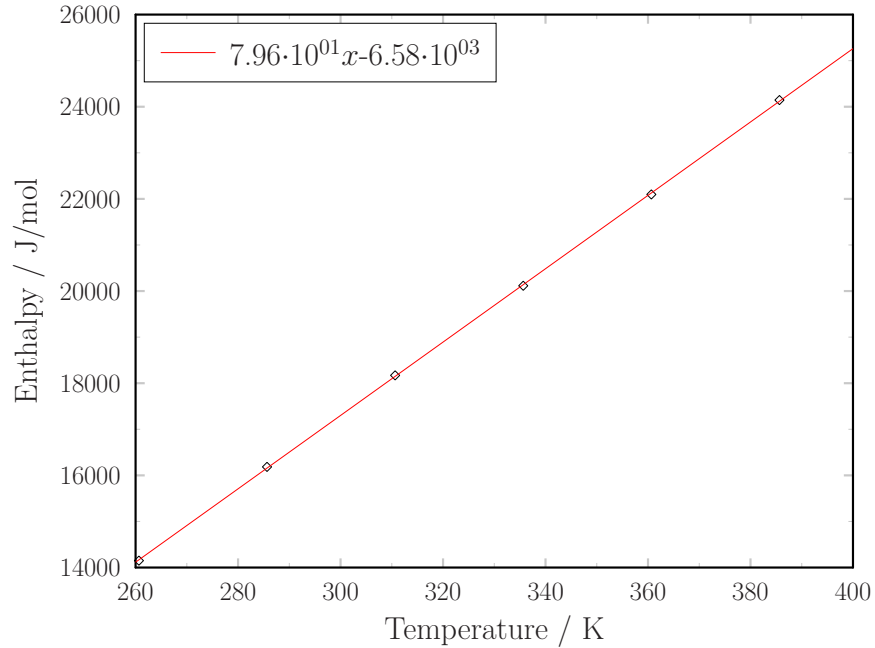

Figure 8: Enthalpy of  $N, p, T$  PIMD simulations as a function of temperature.

Table 10: Simulation temperature, density, average energy and enthalpy.

| $T$<br>K | $\rho$<br>kg/m <sup>3</sup> | $\langle E \rangle$<br>J/mol | $\langle H \rangle$<br>J/mol |
|----------|-----------------------------|------------------------------|------------------------------|
| 260.65   | 1006.0                      | 14147.7                      | 14149.5                      |
| 285.65   | 996.3                       | 16182.0                      | 16183.8                      |
| 310.65   | 978.8                       | 18168.5                      | 18170.4                      |
| 335.65   | 958.3                       | 20112.7                      | 20114.6                      |
| 360.65   | 934.7                       | 22094.7                      | 22096.6                      |
| 385.65   | 903.6                       | 24142.6                      | 24144.7                      |
